# Supplementary material for: Synthesis of Molecularly Imprinted Polymers for the Selective Extraction of Polymyxins from Environmental Water Samples
Source: PubMed Central journal article supplement (PMC7022724; doi:10.3390/polym12010131), 2020-01-06
Supplement: polymers-12-00131-s001.pdf [file polymers-12-00131-s001.pdf]

# Supplementary Materials

## Synthesis of molecularly imprinted polymers for the selective extraction of polymyxins from environmental water samples

Xuqin Song <sup>1</sup>, Antonio Martín-Esteban <sup>2</sup>, Limin He <sup>1\*</sup> and Esther Turiel <sup>2,\*</sup>

<sup>1</sup> National Reference Laboratory of Veterinary Drug Residues (SCAU), College of Veterinary Medicine, South China Agricultural University, Guangzhou 510642, China; [song1991yi@163.com](mailto:song1991yi@163.com); [liminokhe@scau.edu.cn](mailto:liminokhe@scau.edu.cn)

<sup>2</sup> Departamento de Medio Ambiente y Agronomía, INIA, Carretera de A Coruña km 7.5, 28040 Madrid, Spain; [amartin@inia.es](mailto:amartin@inia.es); [turiel@inia.es](mailto:turiel@inia.es)

\* Correspondence: [turiel@inia.es](mailto:turiel@inia.es); Tel.: + 34 91 3478700; fax: + 34 91 3474008

\* Co-Correspondence: [liminokhe@scau.edu.cn](mailto:liminokhe@scau.edu.cn); Tel.: +86 20 85280665; fax: +86 20 85284896

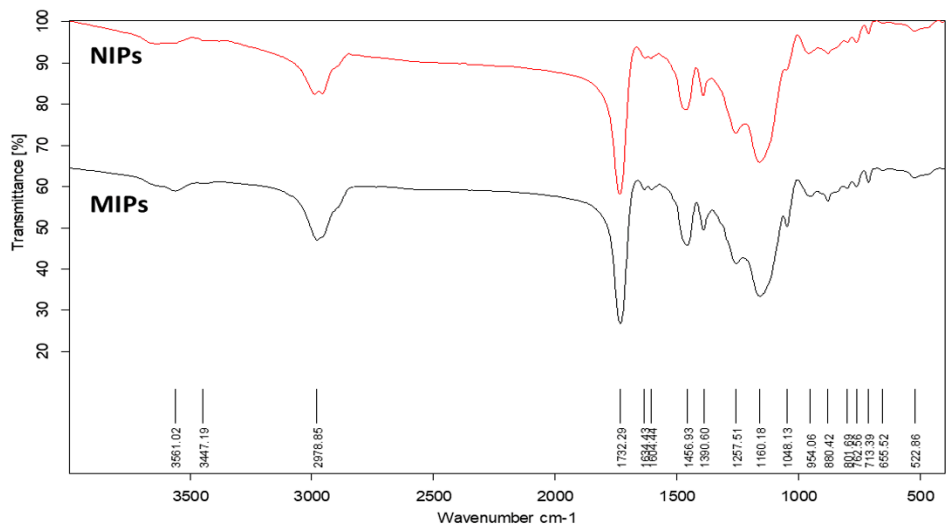

**Figure S1.** IR spectra of MIPs and NIPs

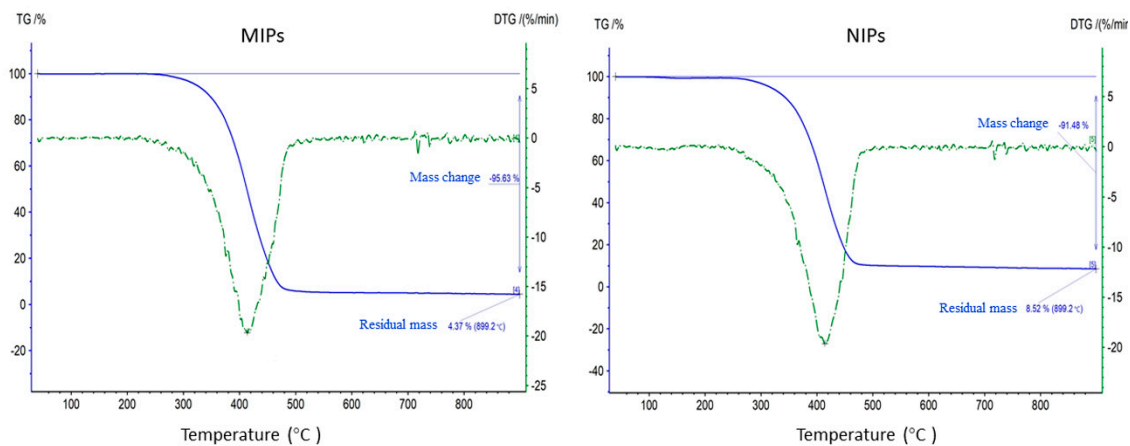

**Figure S2.** The thermogravimetric analysis of MIPs and NIPs

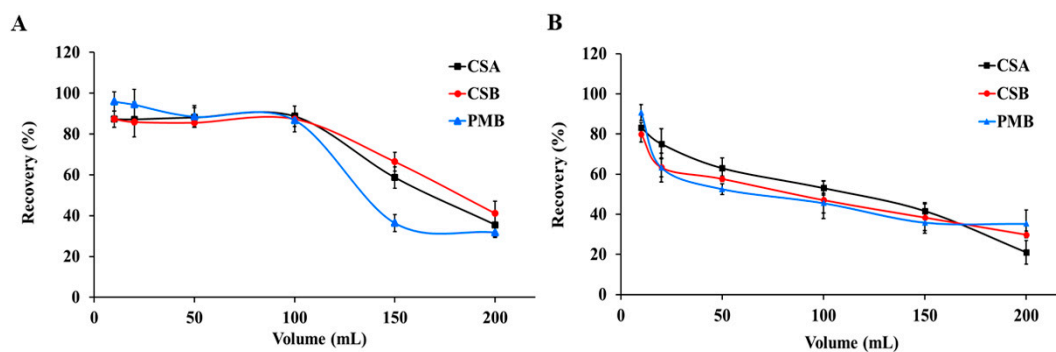

**Figure S3.** Effect of loading volume on the recoveries of colistin A (CSA), colistin B (CSB) and polymyxin B (PMB) obtained after SPE onto (A) MIP and (B) NIP cartridges.

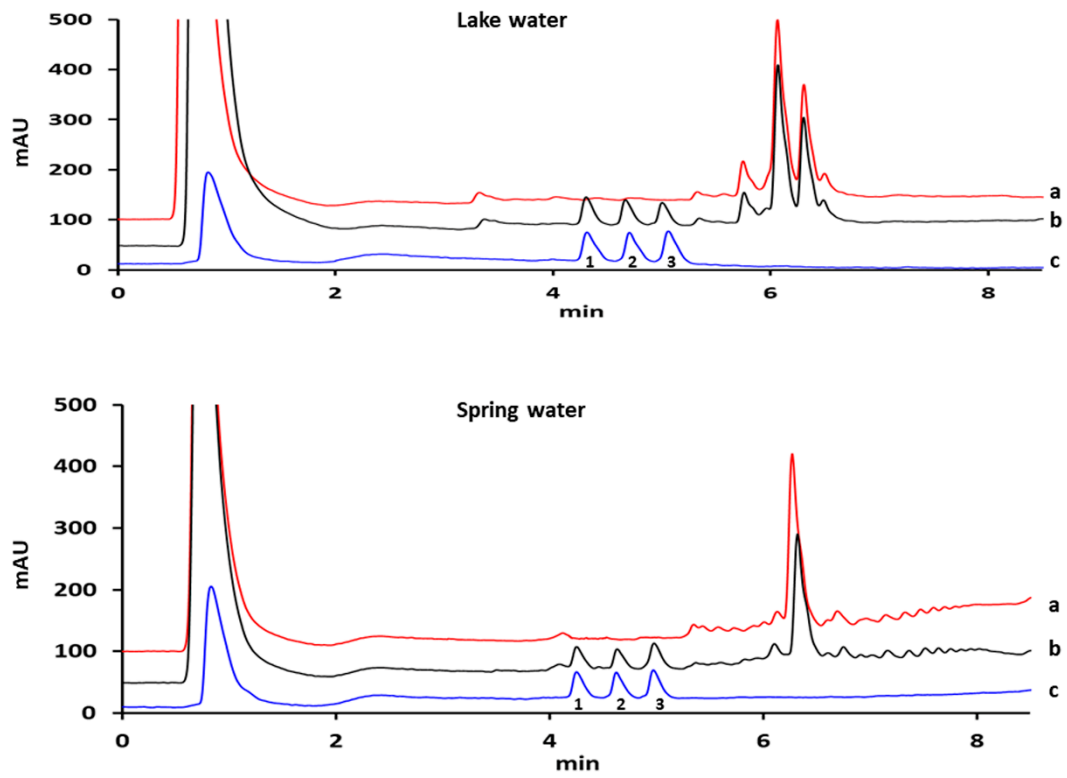

**Figure S4.** HPLC chromatograms obtained after MISPE of target analytes from lake and spring water: (a) non-spiked water, (b) spiked water at 10 µg L<sup>-1</sup> concentration level and (c) mixed standard solution. Peak identifications: 1, colistin B; 2, colistin A; 3 polymyxin B
